# Supplementary figures and images for: Kinesio Taping and Postural Correction: Effects on Kyphosis, Chest Expansion, and Quality of Life: Randomized Clinical Trial
Source: Research Square preprint supplement (doi:10.21203/rs.3.rs-6151934/v1), 2025-04-03

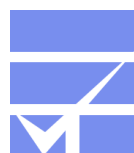

## CONSORT 2010 Flow Diagram

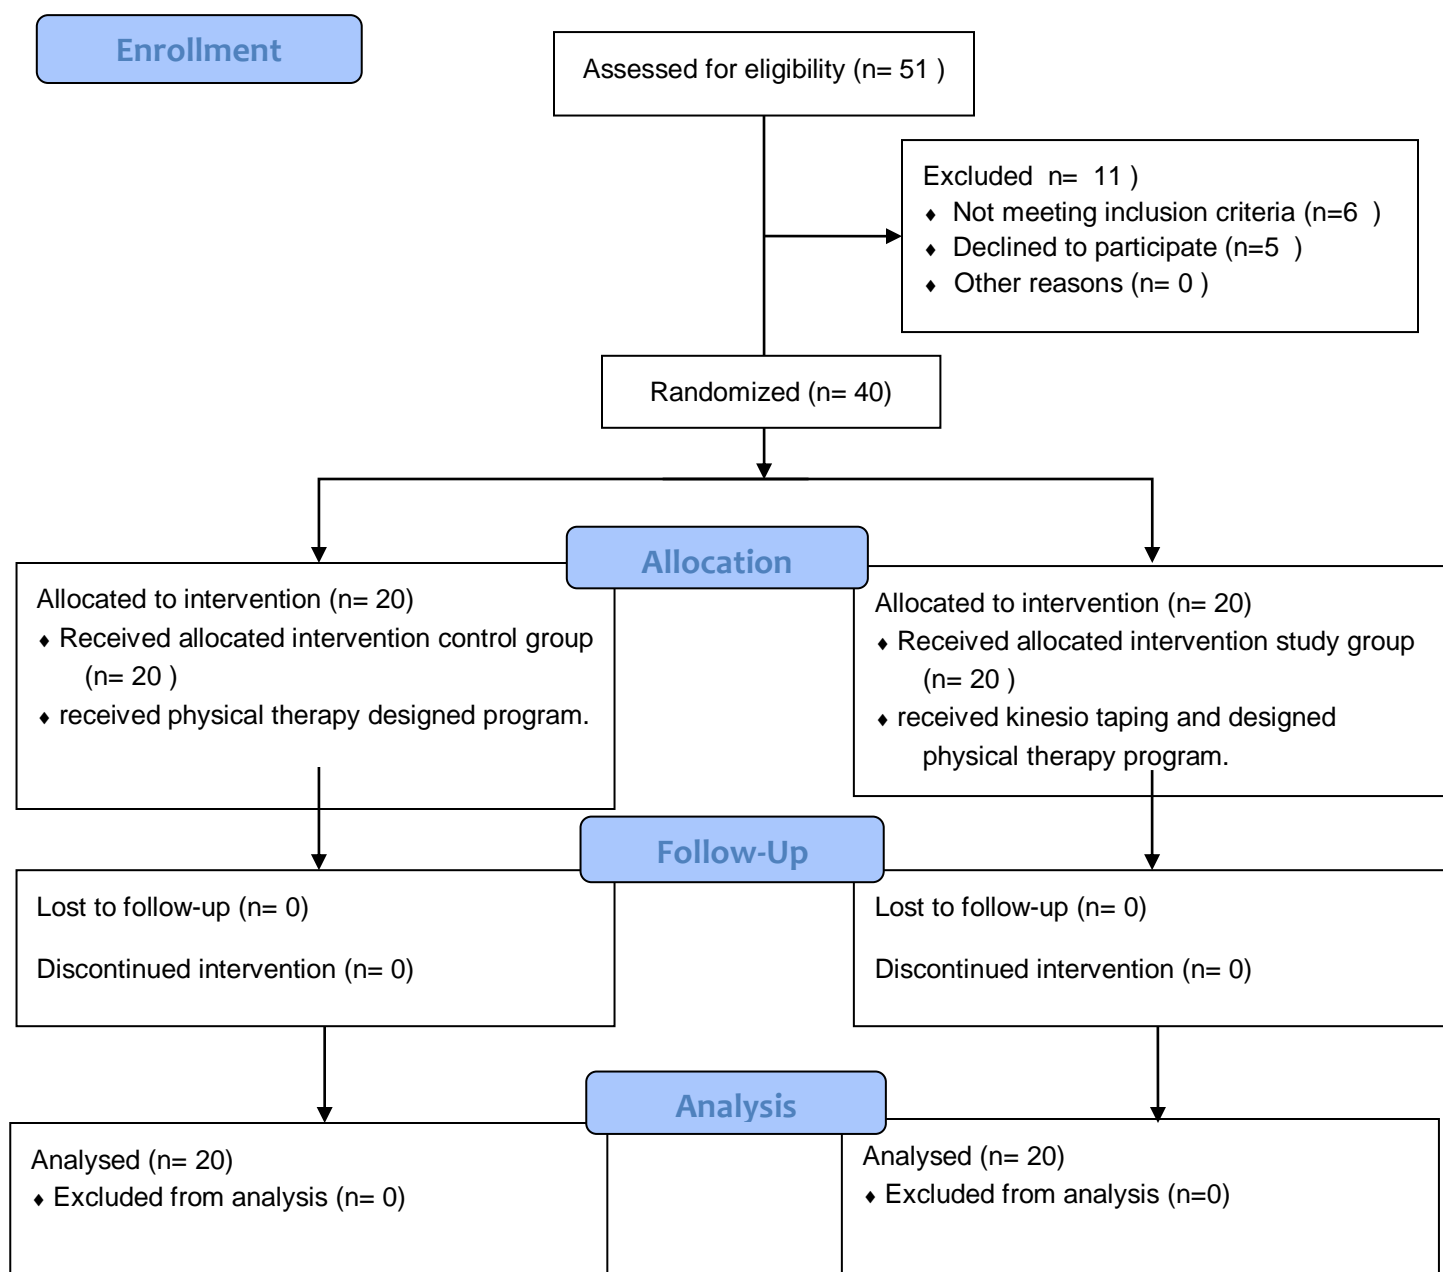

Supplement: Supplementary file 1 [file 574c23397609396a1299534d.pdf]
